# Supplementary material for: Overview of the Genetic Causes of Hereditary Breast and Ovarian Cancer Syndrome in a Large French Patient Cohort
Source: MDPI journal article supplement (doi:10.3390/cancers15133420), 2023-06-29
Supplement: s1 [file s1]

Supplementary Table S1 : Primer Sequences used for the RNA Analysis

| Variants                     | Forward                       | Reverse                       |
|------------------------------|-------------------------------|-------------------------------|
| RAD51C c.145+3A>C            | T1F : CTCCGGGGTTAGCAGGTG      | T6RAGGAACAAGCAAGGCCTGAT       |
| PALB2<br>c.1631_1684+1846del | T2F : TACAGCAAGACACTAGCCCG    | T5R : TTGACTCAAAGGGCTCCACT    |
| PALB2 :c.3350+4A>G           | T9F : GTTAGTAGCAGTGGGACCCT    | T13R :TGCCATTTGAAGCTTTATGTACA |
| RAD51C :c.905-2delA          | T4F : CGAAAAGCTTTGGAGGATTTCAC | T9R : TTCATTCATGCCATAGTGTGTTT |

Supplementary Table S2: Summary of carriers of (likely) pathogenic *PTEN* variant

| Patient | Mutation                             | diagnosis                                                                              | symptoms in relatives                                                                                         |
|---------|--------------------------------------|----------------------------------------------------------------------------------------|---------------------------------------------------------------------------------------------------------------|
| S1      | <b>c.493-1G&gt;C p.?</b>             | -papillary thyroid carcinoma (23)<br>-meningioma (40)<br>-bilateral breast cancer (56) | -mother: Breast cancer (50)<br>-sister: breast cancer (44)                                                    |
| S2      | <b>c.389G&gt;C<br/>p.(Arg130Pro)</b> | -Breast cancer (48)<br>- macrocephalia<br>- thyroid nodules                            | -father: polyposis<br>-paternal aunt: thyroid nodules + breast cancer                                         |
| S3      | <b>c.389G&gt;C<br/>p.(Arg130Pro)</b> | -polyposis (33)<br>-endometrial cancer (34)<br>-breast cancer (46)                     | -mother: polyposis+ leiomyoma + thyroid nodules + breast cancer (54)<br>-sister: bilateral breast cancer (34) |
| S4      | <b>c.1003C&gt;T<br/>p.(Arg335*)</b>  | - epithelial thyroid cancer (29)<br>-breast carcinoma (37)                             | -mother: bilateral breast cancer (37+41)                                                                      |

Supplementary Table S3: Summary of ovarian cancer patients' carriers of (likely) pathogenic in MMR genes

| Variant                               | Proband | relatives                                                       |
|---------------------------------------|---------|-----------------------------------------------------------------|
| MSH6 : Exon1-Exon4 deletion           | OV (58) | Father : Bladder Cancer (90)<br>Mother : Colorectal cancer (84) |
| PMS2: c.137G>T p.(Ser46Ile)           | OV (50) | Sister : skin lymphosarcoma (50)                                |
| MSH6 : c.123_124del p.(Pro42Phefs*47) | OV (62) | /                                                               |
| MLH1 : c.677+3A>G                     | OV (?)  | /                                                               |

OV : ovarian cancer

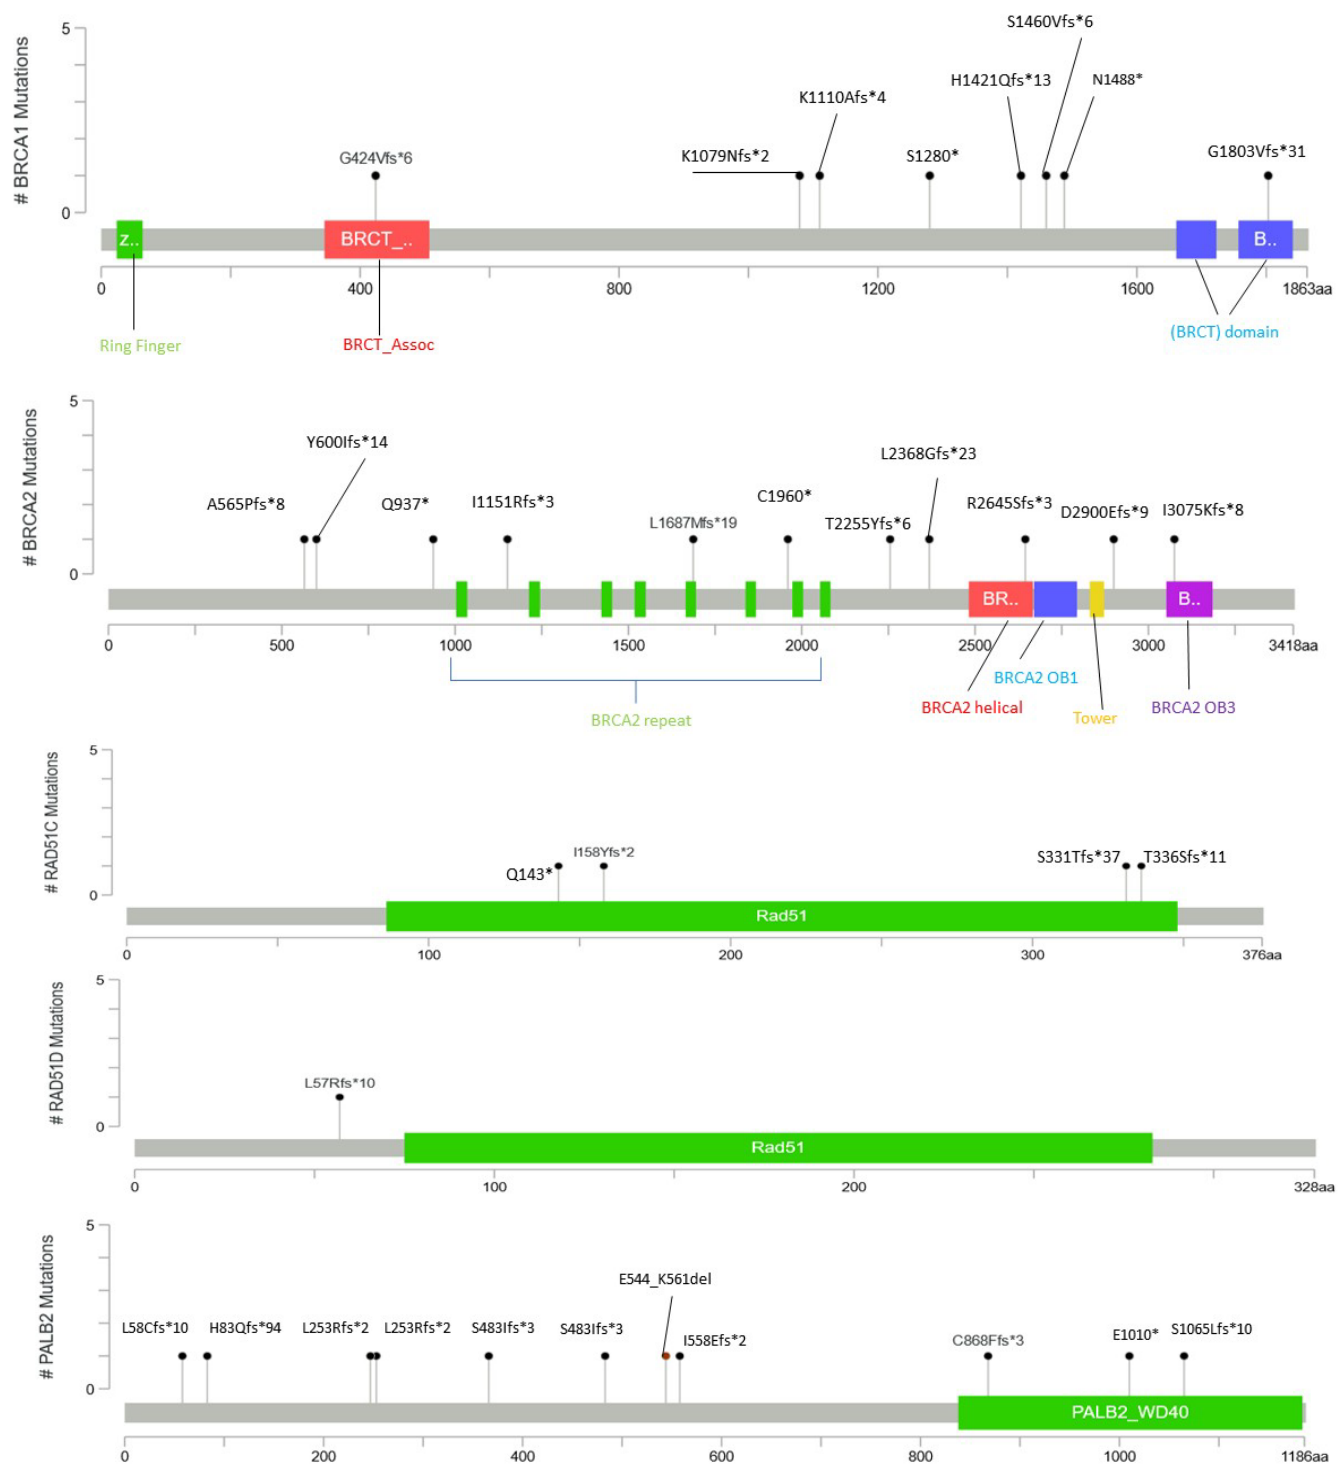

Figure S1. Lollipop representing BRCA1, BRCA2, PALB2, RAD51C and RAD51D proteins. Novel (likely) pathogenic variants with possible functional impact are presented above the corresponding protein scheme (MutationMapper tool from cBioPortal for Cancer Genomics)
